# Supplementary material
Source: PubMed Central journal article supplement (PMC1500852)
Supplement: 7601176s1.pdf [file 7601176s1.pdf]

A

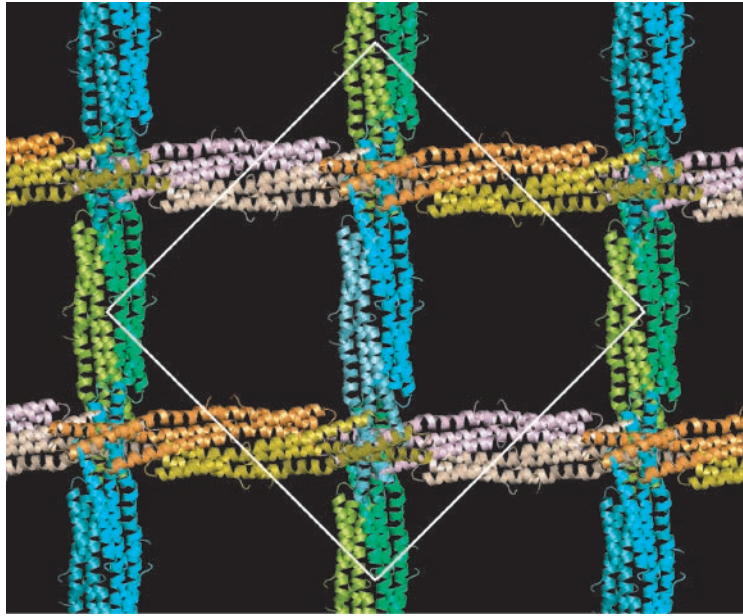

B

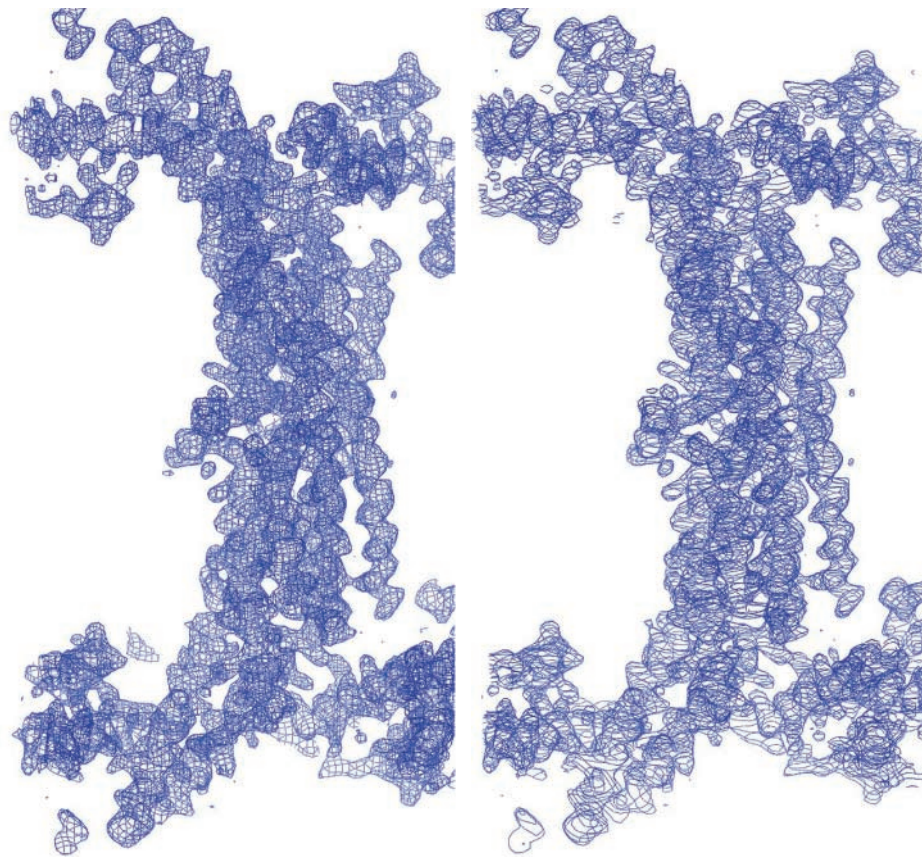

**Supplementary Figure 1.** Crystal packing and experimental density map of the wild-type endophilin A1 BAR domain. (A) The crystal belongs to the space group  $I4_1$  and shows a high solvent content of 83%. Two polypeptide chains in the dimer are related by the crystallographic two-fold rotational symmetry. Elongated crescent-shaped proteins are packed into a meshwork that allows macro molecules to penetrate into the crystal. This packing is stable at least from pH 5.4 to 9.5. The  $\Delta$ App mutant showed almost identical crystal packing. (B) Stereoviews of the experimental electron-density map contoured at  $1.2 \sigma$  covering an entire endophilin A1 BAR dimer. The map was calculated at 3.2 Å resolution with density modified MAD phases by RESOLVE.
