# Supplementary material
Source: PubMed Central journal article supplement (PMC1500852)
Supplement: 7601176s4.pdf [file 7601176s4.pdf]

Supplementary Figure 4

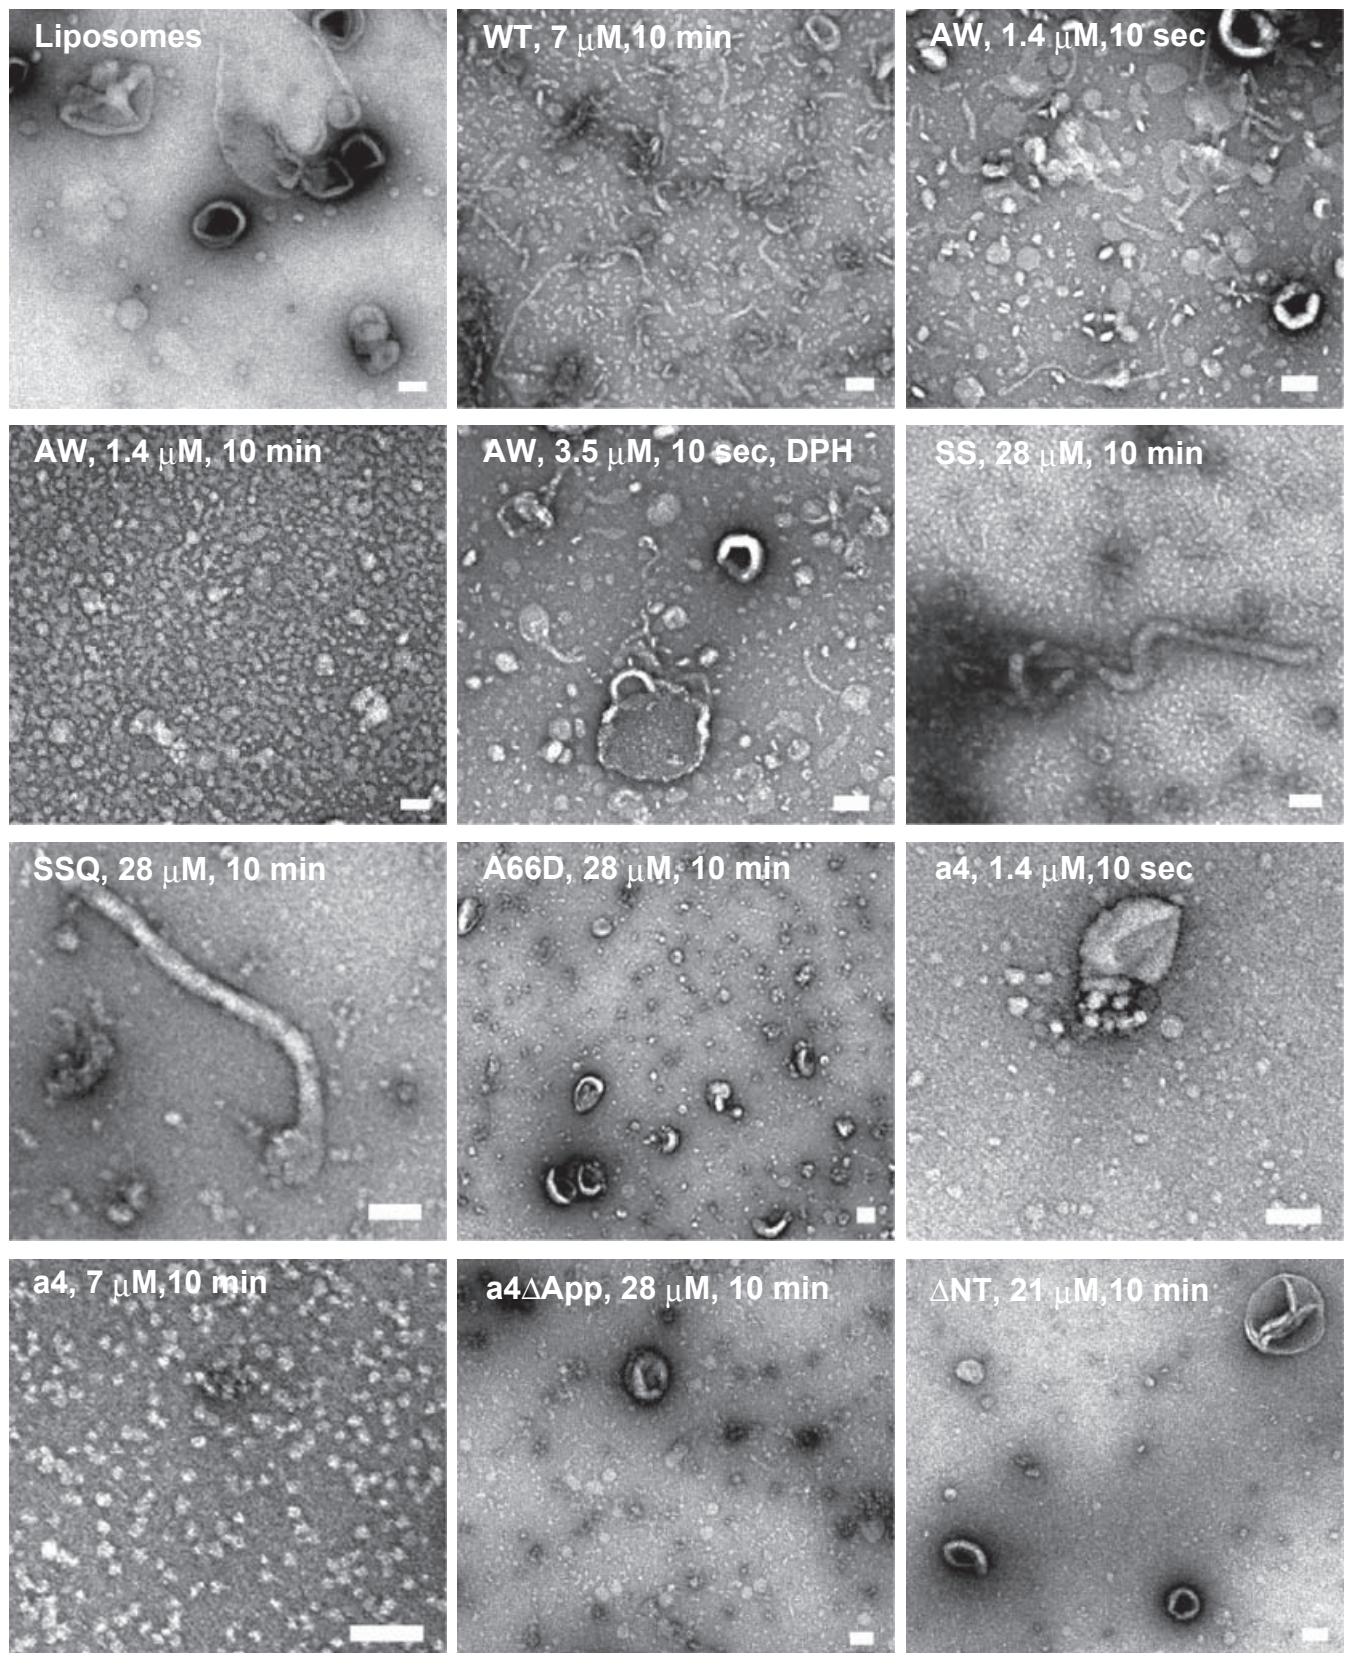

**Supplementary Figure 4.** Liposome tubulation assay. Endophilin BAR domain (WT) and its various mutants are mixed with 200  $\mu$ g/ml liposomes or DPH-liposome (DPH). The concentration of protein and the incubation time are specified on each electron micrograph. Scale bar, 100 nm.
