# Supplementary material
Source: PubMed Central journal article supplement (PMC1500852)
Supplement: 7601176s7.pdf [file 7601176s7.pdf]

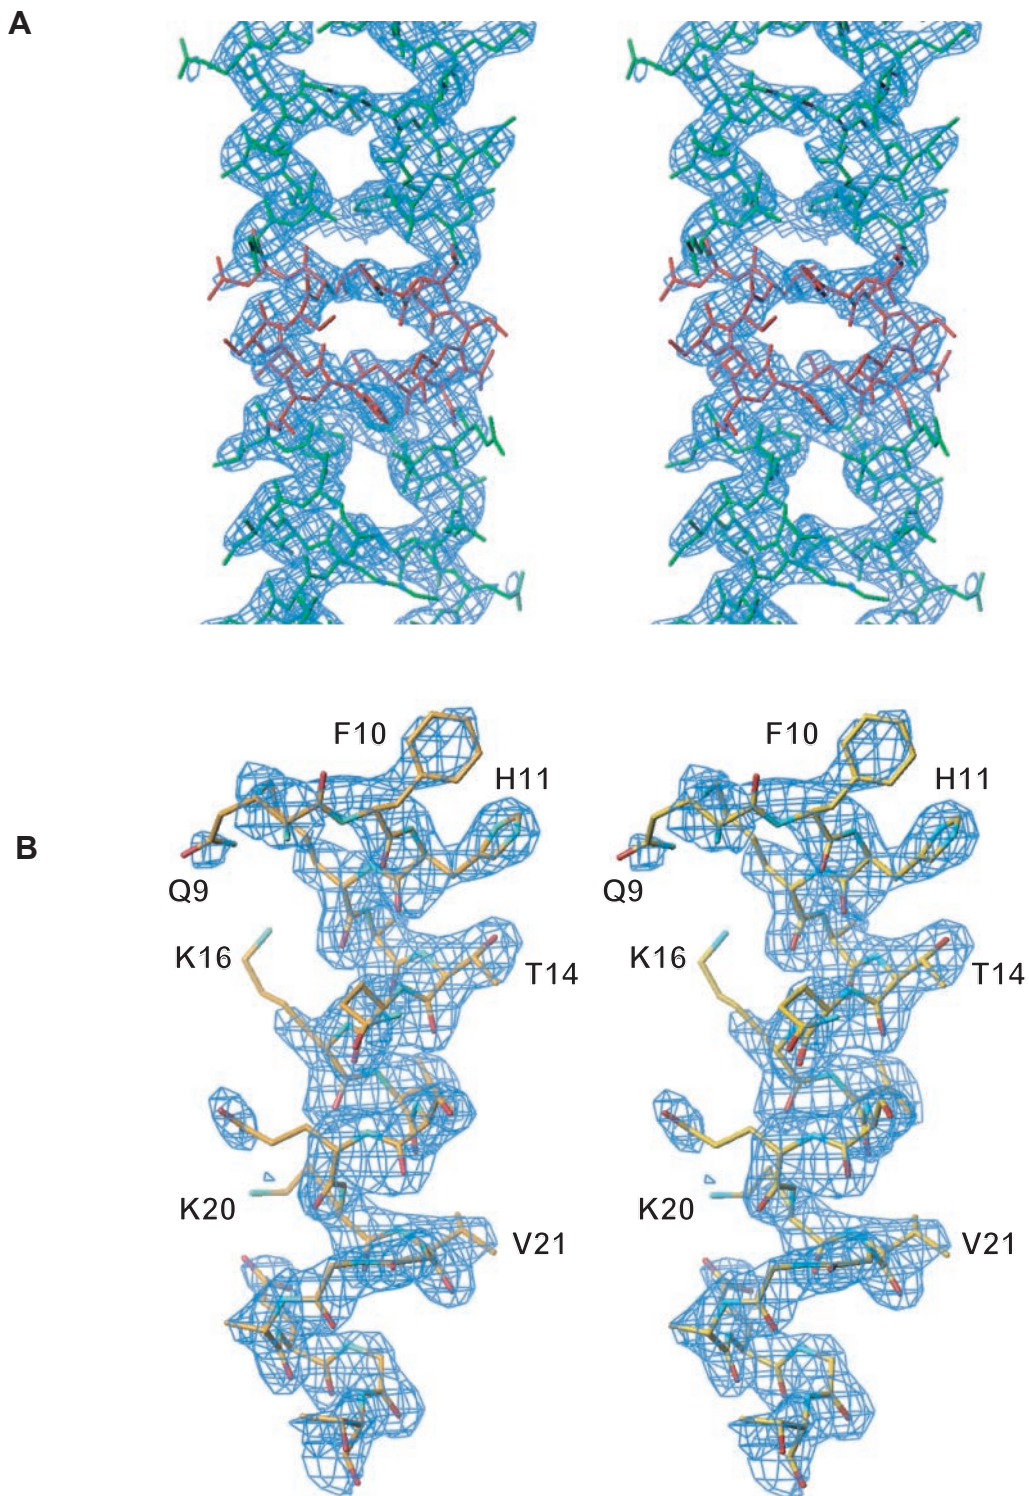

**Supplementary Figure 7.** The simulated annealing omit electron density maps. (A) The  $\Delta$ App mutant map, contoured at 1.5s and covers the mutated region (red), shows the continuous  $\alpha$ -helical structure of the helix I. (B) The a4 mutant map contoured at 1.0s and covers the helix 0. It is disordered from H11 due to crystal packing. There is no room for possible extension of helix 0 toward the N-terminus.
