# Supplementary material
Source: PubMed Central journal article supplement (PMC1500852)
Supplement: 7601176s9.pdf [file 7601176s9.pdf]

Supplementary Table I

**Table 1** Data collection, phasing and refinement statistics

|                                                     | Wild type<br>(crystal 1)  |                      |                            |                           | Wild type<br>(crystal 2) | $\Delta$ App<br>mutant   | a4<br>mutant             |
|-----------------------------------------------------|---------------------------|----------------------|----------------------------|---------------------------|--------------------------|--------------------------|--------------------------|
| <b>Data collection</b>                              |                           |                      |                            |                           |                          |                          |                          |
| Space group                                         | I4 <sub>1</sub>           |                      |                            |                           | I4 <sub>1</sub>          | I4 <sub>1</sub>          | P2 <sub>1</sub>          |
| Cell dimensions                                     |                           |                      |                            |                           |                          |                          |                          |
| <i>a, b, c</i> (Å)                                  | 126.1,<br>126.1,<br>101.3 |                      |                            |                           | 127.4,<br>127.4,<br>99.6 | 129.1,<br>129.1,<br>98.0 | 44.3,<br>212.2,<br>54.3  |
| $\alpha, \beta, \gamma$ (°)                         | 90, 90, 90                |                      |                            |                           | 90, 90, 90               | 90, 90, 90               | 90,<br>97.0, 90          |
|                                                     | <i>Inflection</i>         | <i>Peak</i>          | <i>Remote</i><br><i>1</i>  | <i>Remote</i><br><i>2</i> |                          |                          |                          |
| Wavelength                                          | 0.9794                    | 0.9793               | 0.9817                     | 0.9734                    | 0.9797                   | 1.0                      | 1.0                      |
| Resolution (Å)                                      | 50-3.2<br>(3.31-3.2)      | 50-3.2<br>(3.31-3.2) | 50-3.25<br>(3.37-<br>3.25) | 50-3.3<br>(3.42-<br>3.3)  | 50-3.1<br>(3.21-3.1)     | 20-2.9<br>(3.0-2.9)      | 50-2.4<br>(2.49-<br>2.4) |
| <i>R</i> <sub>merge</sub>                           | 0.065<br>(0.451)          | 0.065<br>(0.371)     | 0.063<br>(0.372)           | 0.087<br>(0.394)          | 0.066<br>(0.363)         | 0.074<br>(0.350)         | 0.098<br>(0.323)         |
| <i>I</i> / $\sigma$ <i>I</i>                        | 21.3<br>(3.1)             | 23.4<br>(8.5)        | 21.4<br>(8.37)             | 19.3<br>(7.0)             | 22.9<br>(4.5)            | 20.7<br>(5.5)            | 11.0<br>(3.7)            |
| Completeness (%)                                    | 99.8<br>(100)             | 99.9<br>(100)        | 99.8<br>(100)              | 99.9<br>(100)             | 99.6<br>(100)            | 99.8<br>(100)            | 99.6<br>(93.5)           |
| Redundancy                                          | 7.56                      | 7.58                 | 7.55                       | 7.54                      | 7.64                     | 6.47                     | 3.8                      |
| <b>Refinement</b>                                   |                           |                      |                            |                           |                          |                          |                          |
| Resolution (Å)                                      |                           |                      |                            |                           | 20-3.1                   | 20-2.9                   | 50-2.4                   |
| No. reflections                                     |                           |                      |                            |                           | 14449                    | 16852                    | 38523                    |
| <i>R</i> <sub>work</sub> / <i>R</i> <sub>free</sub> |                           |                      |                            |                           | 0.236<br>/0.264          | 0.238<br>/0.269          | 0.215<br>/0.270          |
| No. atoms                                           |                           |                      |                            |                           |                          |                          |                          |
| Protein                                             |                           |                      |                            |                           | 1698                     | 1622                     | 7204                     |
| Ligand/ion                                          |                           |                      |                            |                           | 0                        | 0                        | 1 (Ca <sup>2+</sup> )    |
| Water                                               |                           |                      |                            |                           | 0                        | 0                        | 197                      |
| B-factors                                           |                           |                      |                            |                           |                          |                          |                          |
| Protein                                             |                           |                      |                            |                           | 84.8                     | 74.8                     | 54.7                     |
| Ligand/ion                                          |                           |                      |                            |                           |                          |                          | 54.6                     |
| Water                                               |                           |                      |                            |                           |                          |                          | 36.3                     |
| R.m.s deviations                                    |                           |                      |                            |                           |                          |                          |                          |
| Bond lengths<br>(Å)                                 |                           |                      |                            |                           | 0.0057                   | 0.0072                   | 0.0051                   |
| Bond angles (°)                                     |                           |                      |                            |                           | 1.03                     | 1.10                     | 0.959                    |

Highest resolution shell is shown in parenthesis.
