# Supplementary material
Source: PubMed Central journal article supplement (PMC1500852)
Supplement: 7601176s10.pdf [file 7601176s10.pdf]

## Supplementary Table II

|       | BAR domain   | Condition   |        | N    | mean | s.d. | Pairwise comparison against |     |     |      |
|-------|--------------|-------------|--------|------|------|------|-----------------------------|-----|-----|------|
|       |              |             |        |      |      |      | WT1                         | WT2 | WT3 | WT4  |
| Set 1 | Wild-type 1  | 7 $\mu$ M   | 10 min | 981  | 14.1 | 2.8  |                             |     |     |      |
|       | A66W         | 1.4 $\mu$ M | 10 sec | 310  | 11.7 | 2.5  | **                          | **  | **  | N.S. |
|       | A66W-DPH     | 3.5 $\mu$ M | 10 sec | 212  | 14.6 | 2.3  | N.S.                        | **  | **  | **   |
| Set 2 | Wild-type 2  | 7 $\mu$ M   | 10 min | 285  | 15.7 | 2.3  |                             |     |     |      |
|       | SSQ          | 28 $\mu$ M  | 10 min | 248  | 44.1 | 6.4  | **                          | **  | **  | **   |
|       | SS           | 28 $\mu$ M  | 10 min | 33   | 43.0 | 5.4  | **                          | **  | **  | **   |
| Set 3 | Wild-type 3  | 7 $\mu$ M   | 10 min | 612  | 15.6 | 2.6  |                             |     |     |      |
| Set 4 | Wild-type 4  | 7 $\mu$ M   | 10 min | 214  | 12.7 | 2.5  |                             |     |     |      |
|       | $\Delta$ App | 7 $\mu$ M   | 10 min | 94   | 20.9 | 3.6  | **                          | **  | **  | **   |
|       | Amphiphysin  | 7 $\mu$ M   | 10 min | 143  | 19.1 | 2.9  | **                          | **  | **  | **   |
| Total |              |             |        | 3132 | 17.5 | 9.1  |                             |     |     |      |

**Supplementary Table I.** Statistical analyses of liposome tube diameters. Four sets of measurements were made using three different preparations of the wild-type BAR domains (The sets 2 and 3 used the same preparation). One preparation of brain liposomes was used for each set. Multiple comparison (one-way ANOVA and Kruskal and Wallis test) in each set was extremely significant ( $P \ll 0.001$ ). However, considerable differences were observed among the wild-type data. To examine whether these difference were within the deviation of the wild-type data, whole data were pooled, analyzed by ANOVA and then pairwise comparisons against each wild-type data were performed using Scheffe' s test (N.T.,  $P > 0.05$ ; \*\*,  $P < 0.01$ ). At present, we conclude that the tubule diameters induced by the SSQ, SS,  $\Delta$ App, and amphiphysin BAR domains differ significantly from that of the wild-type endophilin A1 BAR, but the narrower tubule diameter of the A66W mutant may rather reflects the transient nature of the tubulation.
